# Supplementary material
Source: PubMed Central journal article supplement (PMC5603177)
Supplement: NIHMS899226-supplement-1.pdf [file NIHMS899226-supplement-1.pdf]

**Supplemental Table 1. Effects of Covariates on Study Endpoints**

| covariate                          | Outcome*              |                      |                      |                      |                           |                      |
|------------------------------------|-----------------------|----------------------|----------------------|----------------------|---------------------------|----------------------|
|                                    | Disease-free survival | Distant Metastasis   | Local Progression    | Biochemical Failure  | Disease-specific Survival | Overall Survival     |
| <b>Treatment LDAD vs. SDAD</b>     | 0.71<br>(0.64, 0.79)  | 0.64<br>(0.51, 0.80) | 0.54<br>(0.42, 0.69) | 0.58<br>(0.50, 0.66) | 0.70<br>(0.55, 0.89)      | 0.88<br>(0.79, 0.98) |
| <b>T Stage T3 vs. T2</b>           | 1.08<br>(0.97, 1.21)  | 1.62<br>(1.28, 2.05) | 1.33<br>(1.04, 1.70) | 1.18<br>(1.03, 1.36) | 1.51<br>(1.18, 1.94)      | 1.05<br>(0.93, 1.17) |
| <b>T Stage T4 vs. T2</b>           | 1.47<br>(1.11, 1.93)  | 3.64<br>(2.35, 5.66) | 1.68<br>(0.94, 2.99) | 1.66<br>(1.18, 2.34) | 3.16<br>(1.96, 5.12)      | 1.73<br>(1.30, 2.31) |
| <b>N stage N0/Nx vs. N1, N2</b>    | 0.59<br>(0.45, 0.76)  | 0.55<br>(0.37, 0.81) | 0.70<br>(0.43, 1.15) | 0.56<br>(0.42, 0.75) | 0.47<br>(0.31, 0.70)      | 0.72<br>(0.55, 0.95) |
| <b>Initial PSA &gt;30 vs. 0-30</b> | 1.34<br>(1.20, 1.50)  | 1.39<br>(1.12, 1.73) | 1.03<br>(0.80, 1.32) | 1.68<br>(1.46, 1.94) | 1.33<br>(1.05, 1.68)      | 1.04<br>(0.92, 1.18) |
| <b>Gleason 8-10 vs. &lt;8</b>      | 1.27<br>(1.12, 1.44)  | 2.10<br>(1.68, 2.63) | 1.41<br>(1.08, 1.82) | 1.33<br>(1.14, 1.56) | 2.20<br>(1.73, 2.81)      | 1.32<br>(1.15, 1.50) |
| <b>Age (per year)</b>              | 1.01<br>(1.01, 1.02)  | 0.97<br>(0.95, 0.98) | 0.98<br>(0.96, 1.00) | 0.98<br>(0.97, 0.99) | 0.98<br>(0.96, 1.00)      | 1.05<br>(1.04, 1.06) |

\*Table entries are hazard ratio with 95% confidence interval for first vs. second category of covariate from model containing all covariates shown
