# Supplementary material
Source: PubMed Central journal article supplement (PMC5603177)
Supplement: NIHMS899226-supplement-2.pdf [file NIHMS899226-supplement-2.pdf]

**Supplemental Table 2. Percentage of Patients with Adverse Events by Grade for Relevant Adverse Event Categories**

| Category*                                     | STAD + RT (n=763) |      |     |      |     | LTAD + RT (n=756) |      |      |     |     |
|-----------------------------------------------|-------------------|------|-----|------|-----|-------------------|------|------|-----|-----|
|                                               | Grade             |      |     |      |     | Grade             |      |      |     |     |
|                                               | 1                 | 2    | 3   | 4    | 5   | 1                 | 2    | 3    | 4   | 5   |
| <b>Acute RT</b>                               |                   |      |     |      |     |                   |      |      |     |     |
| Skin                                          | 26.9              | 12.8 | 0.3 | 0.1  | 0   | 25.4              | 14.9 | 0.4  | 0.1 | 0   |
| Bladder                                       | 37.0              | 25.3 | 4.9 | 0.4  | 0   | 37.8              | 24.2 | 2.9  | 0.4 | 0   |
| Bowel                                         | 26.9              | 34.6 | 1.3 | 0    | 0   | 24.7              | 35.8 | 0.8  | 0   | 0   |
| Other GI                                      | 9.0               | 5.4  | 0.1 | 0    | 0   | 6.6               | 7.4  | 0.1  | 0.1 | 0   |
| Other GU                                      | 6.4               | 2.6  | 0.5 | 0.1  | 0   | 6.4               | 3.0  | 0.1  | 0.1 | 0   |
| Other                                         | 30.1              | 42.1 | 3.9 | 0.8  | 0   | 29.2              | 42.7 | 3.8  | 0.9 | 0   |
| Maximum (all acute RT)                        | 30.0              | 55.0 | 8.5 | 1.31 | 0   | 27.8              | 54.0 | 6.6  | 1.7 | 0   |
| <b>Late RT</b>                                |                   |      |     |      |     |                   |      |      |     |     |
| Skin                                          | 5.5               | 0.9  | 0   | 0    | 0   | 7.5               | 0.7  | 0    | 0   | 0   |
| Bladder                                       | 25.4              | 12.1 | 4.3 | 0.1  | 0   | 21.4              | 15.9 | 3.6  | 1.3 | 0   |
| Bowel                                         | 28.8              | 13.5 | 0.8 | 0.3  | 0.1 | 28.0              | 13.1 | 1.9  | 0.3 | 0.3 |
| Other GI                                      | 9.8               | 2.9  | 0.3 | 0    | 0   | 13.2              | 3.8  | 0.5  | 0.1 | 0   |
| Other GU                                      | 15.1              | 5.2  | 1.2 | 0.1  | 0   | 15.9              | 6.4  | 0.8  | 0.4 | 0   |
| Other                                         | 11.4              | 3.3  | 0.8 | 0    | 0   | 10.3              | 4.9  | 1.2  | 0.1 | 0   |
| Maximum (all late RT)                         | 36.4              | 25.8 | 6.6 | 0.5  | 0.1 | 31.3              | 26.9 | 6.9  | 2.0 | 0.3 |
| <b>Toxicities associated With hormone use</b> |                   |      |     |      |     |                   |      |      |     |     |
| Nausea                                        | 0                 | 0.4  | 0   | 0    | 0   | 0                 | 0    | 0.3  | 0   | 0   |
| Vomiting                                      | 0.1               | 0.3  | 0   | 0    | 0   | 0                 | 0.1  | 0.1  | 0   | 0   |
| Diarrhea                                      | 1.6               | 4.2  | 0.9 | 0.1  | 0   | 0                 | 2.8  | 0.9  | 0.1 | 0   |
| Headache                                      | 0                 | 0    | 0.1 | 0    | 0   | 0                 | 0    | 0    | 0   | 0   |
| Fluid Retention                               | 0                 | 0.1  | 0   | 0    | 0   | 0                 | 0    | 0    | 0   | 0   |
| Gynecomastia                                  | 0                 | 0    | 0   | 0    | 0   | 0.1               | 0    | 0    | 0   | 0   |
| Skin Rash                                     | 0.1               | 0.1  | 0   | 0    | 0   | 0.1               | 0.1  | 0.1  | 0   | 0   |
| Infection                                     | 0.1               | 0.1  | 0   | 0    | 0   | 0                 | 0.1  | 0    | 0   | 0   |
| Elevated SGOT                                 | 6.7               | 2.6  | 1.0 | 0.1  | 0   | 12.6              | 2.9  | 1.5  | 0.1 | 0.1 |
| Thromboph/Emboli                              | 0.1               | 0    | 0   | 0    | 0   | 0                 | 0    | 0    | 0   | 0   |
| Cardiac                                       | 0                 | 0    | 0.1 | 0    | 0   | 0                 | 0    | 0.26 | 0   | 0   |
| Hot Flashes                                   | 0                 | 0    | 0   | 0    | 0   | 0.1               | 0    | 0    | 0   | 0   |
| Impotence                                     | 0                 | 0    | 0.1 | 0    | 0   | 0                 | 0    | 0    | 0   | 0   |
| Other                                         | 5.2               | 2.1  | 2.0 | 0.1  | 0   | 8.5               | 1.9  | 1.7  | 0.4 | 0.1 |
| Maximum (all hormone associated)              | 9.4               | 7.3  | 3.8 | 0.3  | 0   | 15.7              | 56.0 | 4.5  | 0.7 | 0.1 |

\*Toxicities were graded with NCI Common Toxicity Criteria (CTC) version 2.0.
